# ANESTHESIOLOGY

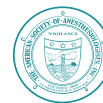

## The Many Benefits of a Preoperative Clinic

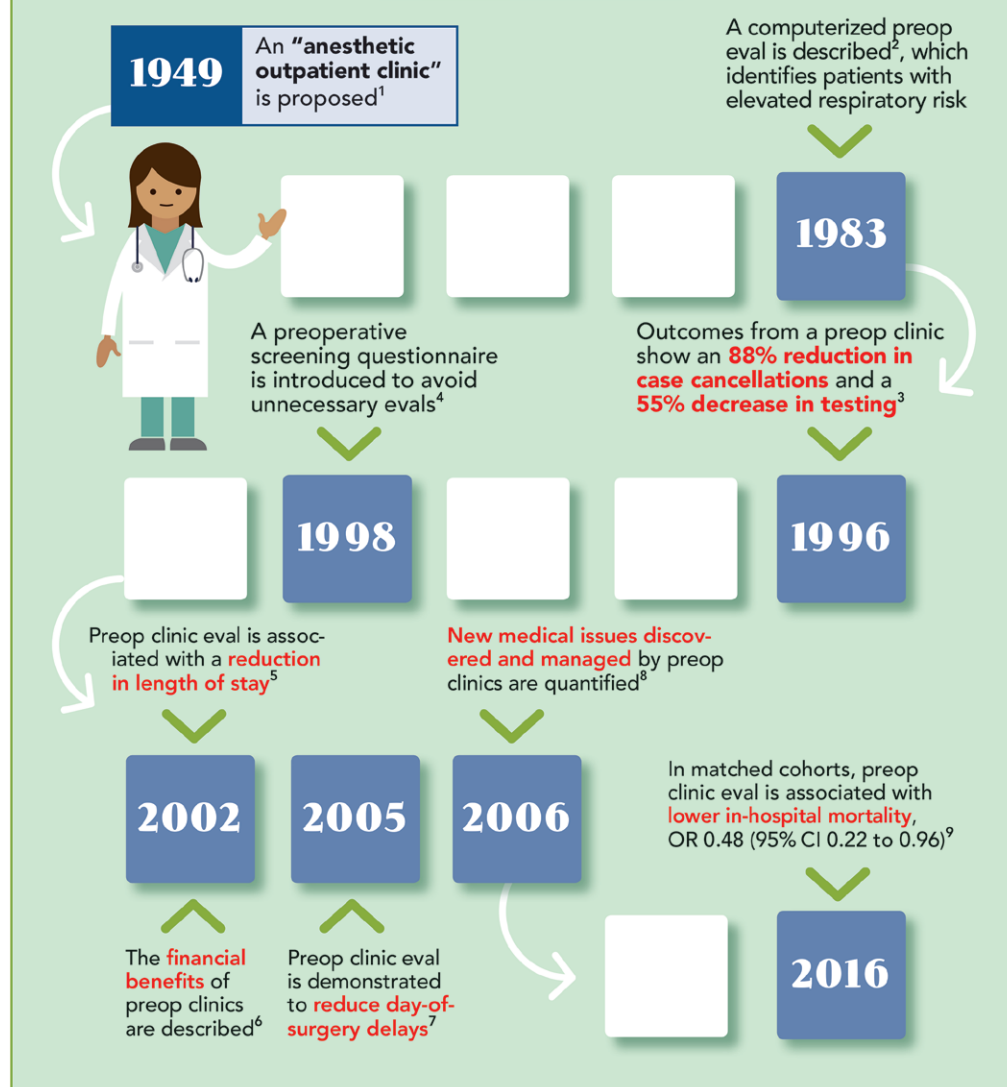

eval = evaluation; OR = odds risk; preop = preoperative.

Infographic created by Jonathan P. Wanderer, Vanderbilt University School of Medicine, BobbieJean Sweitzer, Northwestern University Feinberg School of Medicine, Angela M. Bader, Brigham and Women's Health Care/Harvard Medical School, and James P. Rathmell, Brigham and Women's Health Care/Harvard Medical School. Illustration by Annemarie Johnson, Vivo Visuals. Dr. Wanderer is funded by the Foundation for Anesthesia Education and Research, Schaumburg, Illinois, and Anesthesia Quality Institute's Mentored Research Training Grant—Health Services Research, Schaumburg, Illinois. Address correspondence to Dr. Wanderer: jon.wanderer@vanderbilt.edu.

1. Lee JA: The anaesthetic out-patient clinic. *Anaesthesia* 1949; 4:169-74

2. Chase CR, Merz BA, Mazuzan JE: Computer assisted patient evaluation (CAPE): A multi-purpose computer system for an anesthesia service. *Anesth Analg* 1983; 62:198-206

3. Fischer SP: Development and effectiveness of an anesthesia preoperative evaluation clinic in a teaching hospital. *ANESTHESIOLOGY* 1996; 85:196-206

4. Badner NH, Craen RA, Paul TL, Doyle JA: Anaesthesia preadmission assessment: A new approach through use of a screening questionnaire. *Can J Anaesth* 1998; 45:87-92

5. van Klei WA, Moons KG, Rutten CL, Schuurhuis A, Knape JT, Kalkman CJ, Grobbee DE: The effect of outpatient preoperative evaluation of hospital inpatients on cancellation of surgery and length of hospital stay. *Anesth Analg* 2002; 94:644-9

6. Gibby GL: How preoperative assessment programs can be justified financially to hospital administrators. *Int Anesthesiol Clin* 2002; 40:17-30

7. Fersch MB, Tung A, Sweitzer B, Huo D, Glick DB: Preoperative clinic visits reduce operating room cancellations and delays. *ANESTHESIOLOGY* 2005; 103:855-9

8. Correll DJ, Bader AM, Hull MW, Hsu C, Tsen LC, Hepner DL: Value of preoperative clinic visits in identifying issues with potential impact on operating room efficiency. *ANESTHESIOLOGY* 2006; 105:1254-9

9. Blitz JD, Kendale SM, Jain SK, Cuff GE, Kim JT, Rosenberg AD: Preoperative evaluation clinic visit is associated with decreased risk of in-hospital postoperative mortality. *ANESTHESIOLOGY* 2016; 125:280-94
